# Supplementary material for: Depression among Parents Two to Six Years Following the Loss of a Child by Suicide: A Novel Prediction Model
Source: PLOS journal article supplement (doi:10.1371/journal.pone.0164091), 2016-10-03
Supplement: S2 (10.1371/journal.pone.0164091.s002) [file journal.pone.0164091.s002]

**S1 Table:** Sensitivity analysis results following omission of the predictor biological parenthood: Odds ratios from the reduced multivariable prediction model for long-term depression

| Variable                                                     | Category                                       | OR   | (95% CI)    | p-value |
|--------------------------------------------------------------|------------------------------------------------|------|-------------|---------|
| Sex                                                          |                                                |      |             | 0.004   |
|                                                              | Male                                           | 1.00 |             |         |
|                                                              | Female                                         | 1.85 | (1.22-2.82) |         |
| Employment status at time of loss                            |                                                |      |             | 0.004   |
|                                                              | Not on sick-leave nor unemployed               | 1.00 |             |         |
|                                                              | Sick-leave                                     | 2.79 | (1.49-5.23) |         |
|                                                              | Unemployed                                     | 1.63 | (0.57-4.71) |         |
| History of psychological morbidity <sup>a</sup>              |                                                |      |             | <0.001  |
|                                                              | No                                             | 1.00 |             |         |
|                                                              | Debuting during the last 10 years, before loss | 3.60 | (2.07-6.25) |         |
|                                                              | Debuting more than 10 years ago                | 5.10 | (3.09-8.42) |         |
| History of suicide in other biological relatives             |                                                |      |             | 0.051   |
|                                                              | No                                             | 1.00 |             |         |
|                                                              | Yes                                            | 1.57 | (1.00-2.47) |         |
| Parent was deceased child's legal guardian during upbringing |                                                |      |             | 0.100   |
|                                                              | Yes                                            | 1.00 |             |         |
|                                                              | No                                             | 0.48 | (0.20-1.15) |         |

<sup>a</sup> Psychological treatment, psychiatric diagnosis, or medication against anxiety, or low mood or depression, before the child's suicide.
